# Supplementary material for: Validation of Skeletal Muscle cis-Regulatory Module Predictions Reveals Nucleotide Composition Bias in Functional Enhancers
Source: PLoS Comput Biol. 2011 Dec 1;7(12):e1002256. doi: 10.1371/journal.pcbi.1002256 (PMC3228787; doi:10.1371/journal.pcbi.1002256)
Supplement: Dataset S1 — Contains the detailed list of the genomic regions tested. (XLSX) [file pcbi.1002256.s001.xlsx]

## Sheet: Human Muscle Reference Regions
Chromosome	Start	End	ID
chr17	42641110	42641767	ENSG00000198336		coordinates in hg18
chr1	227636342	227636640	ENSG00000143632
chr12	79625250	79625543	ENSG00000143632
chr1	199655466	199655716	ENSG00000159173
chr1	199657429	199657726	ENSG00000159173
chr17	4747071	4747322	ENSG00000108556
chr16	29983342	29983591	ENSG00000149925
chr17	10313594	10313898	ENSG00000141048
chr17	7125165	7125500	ENSG00000181856
chr5	88235632	88235883	ENSG00000081189
chr2	219990238	219990537	ENSG00000175084
chr22	34343416	34343666	ENSG00000198125
chr2	210861309	210861599	ENSG00000168530
chr19	50517964	50518400	ENSG00000104879
chr2	219991118	219991423	ENSG00000175084
chr2	233112339	233112669	ENSG00000196811
chr15	32874975	32875527	ENSG00000159251
chr1	199658299	199658596	ENSG00000159173
chr3	52461880	52462195	ENSG00000114854
chr11	17692520	17692930	ENSG00000129152
chr17	7288940	7289246	ENSG00000170175
chr17	59420300	59420650	ENSG00000007314
chr19	50518680	50518940	ENSG00000104879
chr1	201321660	201321959	ENSG00000122180
chr17	10502049	10502561	ENSG00000109063
chrX	33132964	33133264	ENSG00000198947
chr14	22947254	22947615	ENSG00000197616
chr14	22974833	22975132	ENSG00000092054

## Sheet: Orig. Muscle Reference Regions
Gene	Ensembl ID	Species	Location	Reference (PMID)
ALDOA	ENSG00000149925	Human	16:29983342-29983591 (+)	10369770, 7473711			Sequence coordinates are based on
DMD	ENSMUSG00000045103	Mouse	X:78342481-78342802 (+)	11259421			The remaining references can be found in:
Mb	ENSMUSG00000018893	Mouse	15:77105536-77105947 (-)	11279187			Wasserman and Fickett, Journal of Molecular Biology 1998
MEF2C	ENSMUSG00000005583	Mouse	13:80578373-80578533 (+)	11714687
MYH4 (Myh2)	ENSMUSG00000057003	Mouse	11:67319083-67319348 (+)	10329954
MYH3	ENSG00000109063	Human	17:10502049-10502561 (-)	11971910
SCN4A (SKM4)	ENSRNOG00000012134	Rat	10:95760108-95760534 (-)	9556626
ACHA (Chrna1)	ENSMUSG00000027107	Mouse	2:73423947-73424246 (-)
ACHB (Chrnb1)	ENSMUSG00000041189	Mouse	11:69877382-69877683 (-)
ACHG (Chrng)	ENSMUSG00000026253	Mouse	1:87106098-87106468 (+)
ACHD (Chrnd)	ENSMUSG00000026251	Mouse	1:87091060-87091359 (+)
ACHE (Chrne)	ENSMUSG00000014609	Mouse	11:70700687-70700984 (-)
KCRM (Ckm)	ENSMUSG00000030399	Mouse	7:17092119-17092419 (+)
DES	ENSG00000175084	Human	2:219990238-219990537 (+)
			2:219991118-219991362 (+)
GTR4 (GLUT4; SLC2A4)	ENSRNOG00000017226	Rat	10:56792535-56792835 (-)	12893821
MYF6	ENSMUSG00000035923	Mouse	10:106957276-106957575 (-)
MYOD	ENSMUSG00000009471	Mouse	7:42547223-42547940 (+)
MYOG	ENSG00000122180	Human	1:201321660-201321959 (-)
MYL1	ENSG00000168530	Human	2:210876569-210877136 (-)
MLE1	ENSRNOG00000013262	Rat	9:65714755-65715054 (-)
MYL4	ENSMUSG00000061086	Mouse	11:104685788-104686460 (+)
TNCC1	ENSMUSG00000021909	Mouse	14:28638838-28639140 (+)
TNNI	ENSG00000159173	Human	1:199658299-199658596 (-)
			1:199655493-199655689 (-)
			1:199657429-199657726 (-)
MYH7	ENSG00000092054	Human	14:22974865-22975132 (-)
MYH6	ENSMUSG00000040752	Mouse	14:49833227-49833526 (-)
ACTC	ENSG00000159251	Human	15:32874975-32875527 (-)
ACTA	ENSG00000143632	Human	1:227636342-227636640 (-)

## Sheet: Predicted Regulatory Regions
Chromosome	Start	End	ID
chr19	8332716	8333081	Amplicon_100_19:8332716-8333081		coordinates in hg18
chr4	6102999	6103371	Amplicon_105_4:6102999-6103371
chr11	73038191	73038559	Amplicon_106_11:73038191-73038559
chr14	61298506	61298864	Amplicon_107_14:61298506-61298864
chr11	3836689	3837056	Amplicon_108_11:3836689-3837056
chr2	85620686	85621039	Amplicon_109_2:85620686-85621039
chr1	219982200	219982571	Amplicon_111_1:219982200-219982571
chr10	71480642	71481015	Amplicon_113_10:71480642-71481015
chr19	51061864	51062220	Amplicon_114_19:51061864-51062220
chr14	52689945	52690298	Amplicon_115_14:52689945-52690298
chrX	23592527	23592890	Amplicon_119_X:23592527-23592890
chr11	66008803	66009164	Amplicon_11_11:66008803-66009164
chr6	42126379	42126735	Amplicon_120_6:42126379-42126735
chr16	30678945	30679295	Amplicon_122_16:30678945-30679295
chr11	116201218	116201584	Amplicon_123_11:116201218-116201584
chr12	97434260	97434633	Amplicon_126_12:97434260-97434633
chr12	112074806	112075158	Amplicon_129_12:112074806-112075158
chr20	30583412	30583765	Amplicon_12_20:30583412-30583765
chr6	24231675	24232025	Amplicon_130_6:24231675-24232025
chr21	42056828	42057188	Amplicon_135_21:42056828-42057188
chr19	18386840	18387190	Amplicon_13_19:18386840-18387190
chr12	53099533	53099903	Amplicon_142_12:53099533-53099903
chr8	28613734	28614095	Amplicon_146_8:28613734-28614095
chr17	6879216	6879571	Amplicon_148_17:6879216-6879571
chr12	103377925	103378275	Amplicon_149_12:103377925-103378275
chr14	74713202	74713555	Amplicon_150_14:74713202-74713555
chr18	68361289	68361642	Amplicon_152_18:68361289-68361642
chr7	100665436	100665794	Amplicon_157_7:100665436-100665794
chr7	72773706	72774066	Amplicon_158_7:72773706-72774066
chr17	1119365	1119715	Amplicon_166_17:1119365-1119715
chr12	109204275	109204630	Amplicon_171_12:109204275-109204630
chr2	242094888	242095238	Amplicon_174_2:242094888-242095238
chr12	6750606	6750976	Amplicon_175_12:6750606-6750976
chr19	43434285	43434640	Amplicon_177_19:43434285-43434640
chrX	153322137	153322505	Amplicon_17_X:153322137-153322505
chr3	48565158	48565521	Amplicon_180_3:48565158-48565521
chr17	62955537	62955912	Amplicon_181_17:62955537-62955912
chr16	54068637	54068993	Amplicon_183_16:54068637-54068993
chr11	9242163	9242523	Amplicon_184_11:9242163-9242523
chr1	200183328	200183678	Amplicon_186_1:200183328-200183678
chrX	16716167	16716522	Amplicon_187_X:16716167-16716522
chr22	20552176	20552543	Amplicon_18_22:20552176-20552543
chr1	24842829	24843202	Amplicon_193_1:24842829-24843202
chr1	27691340	27691709	Amplicon_194_1:27691340-27691709
chr16	70050504	70050858	Amplicon_195_16:70050504-70050858
chr1	31613813	31614172	Amplicon_196_1:31613813-31614172
chrX	86658794	86659147	Amplicon_199_X:86658794-86659147
chr17	37524020	37524380	Amplicon_19_17:37524020-37524380
chr10	104186235	104186591	Amplicon_1_10:104186235-104186591
chr20	56705808	56706173	Amplicon_20_20:56705808-56706173
chr13	113550142	113550509	Amplicon_21_13:113550142-113550509
chr19	40821788	40822143	Amplicon_22_19:40821788-40822143
chr5	138747934	138748306	Amplicon_23_5:138747934-138748306
chr12	123912004	123912356	Amplicon_25_12:123912004-123912356
chr3	52067668	52068015	Amplicon_26_3:52067668-52068015
chr20	2728309	2728669	Amplicon_27_20:2728309-2728669
chr9	132309334	132309709	Amplicon_29_9:132309334-132309709
chr19	51820502	51820868	Amplicon_30_19:51820502-51820868
chr1	55048709	55049056	Amplicon_32_1:55048709-55049056
chr11	1721407	1721765	Amplicon_38_11:1721407-1721765
chr11	117988281	117988649	Amplicon_43_11:117988281-117988649
chr19	51060771	51061117	Amplicon_44_19:51060771-51061117
chr15	72074524	72074886	Amplicon_45_15:72074524-72074886
chr11	71615350	71615709	Amplicon_46_11:71615350-71615709
chr12	56223520	56223869	Amplicon_51_12:56223520-56223869
chr3	140741240	140741614	Amplicon_53_3:140741240-140741614
chr12	4250990	4251350	Amplicon_55_12:4250990-4251350
chr22	28996863	28997214	Amplicon_59_22:28996863-28997214
chr19	1161174	1161533	Amplicon_5_19:1161174-1161533
chr11	118694539	118694910	Amplicon_60_11:118694539-118694910
chr12	25294122	25294474	Amplicon_61_12:25294122-25294474
chr19	6416077	6416432	Amplicon_65_19:6416077-6416432
chr1	179272940	179273298	Amplicon_66_1:179272940-179273298
chr11	27449688	27450053	Amplicon_68_11:27449688-27450053
chr5	177486906	177487262	Amplicon_71_5:177486906-177487262
chr20	42396509	42396874	Amplicon_74_20:42396509-42396874
chr7	138446533	138446895	Amplicon_76_7:138446533-138446895
chr19	48973727	48974097	Amplicon_78_19:48973727-48974097
chr3	197498531	197498881	Amplicon_79_3:197498531-197498881
chr5	108773684	108774055	Amplicon_81_5:108773684-108774055
chr2	96362376	96362735	Amplicon_82_2:96362376-96362735
chr5	52810341	52810707	Amplicon_84_5:52810341-52810707
chr12	54645406	54645757	Amplicon_87_12:54645406-54645757
chr17	37561100	37561450	Amplicon_8_17:37561100-37561450
chr17	5309720	5310075	Amplicon_95_17:5309720-5310075
chr22	37002054	37002429	Amplicon_96_22:37002054-37002429
chr20	61577041	61577391	Amplicon_99_20:61577041-61577391
chr3	73753843	73754213	Amplicon_9_3:73753843-73754213
chr3	128919494	128919818	ENSG00000074416_3:128919494-128919818
chr1	116072547	116072746	ENSG00000118729_1:116072547-116072746
chr2	88147937	88148156	ENSG00000115593_2:88147937-88148156
chr9	35677988	35678317	ENSG00000198467_9:35677988-35678317
chr20	43888471	43888850	ENSG00000101470_20:43888471-43888850
chr10	60714865	60715143	ENSG00000148541_10:60714865-60715143
chr3	71490873	71491142	ENSG00000114861_3:71490873-71491142
chr1	10668605	10668662	ENSG00000130940_1:10668605-10668662
chr3	116273176	116273482	ENSG00000181722_3:116273176-116273482
chr10	105294486	105294885	ENSG00000107954_10:105294486-105294885
chr4	16218957	16219236	ENSG00000169744_4:16218957-16219236
chr14	68180834	68181133	ENSG00000182185_14:68180834-68181133
chr18	51157716	51158065	ENSG00000196628_18:51157716-51158065
chr11	125685570	125685874	ENSG00000110063_11:125685570-125685874
chr15	78876041	78876420	ENSG00000103888_15:78876041-78876420
chr4	128921487	128921776	ENSG00000164070_4:128921487-128921776
chrX	118695200	118695509	ENSG00000125354_X:118695200-118695509
chr5	126639574	126639953	ENSG00000145794_5:126639574-126639953
chr6	42121981	42122330	ENSG00000112576_6:42121981-42122330
chr11	72006394	72006743	ENSG00000186642_11:72006394-72006743
chr17	56788878	56789142	ENSG00000141376_17:56788878-56789142
chr17	37925331	37925730	ENSG00000033627_17:37925331-37925730
chr6	150559688	150560022	ENSG00000198729_6:150559688-150560022
chr12	54388650	54389049	ENSG00000135424_12:54388650-54389049
chr18	51231603	51231802	ENSG00000196628_18:51231603-51231802
chr3	30697900	30697942	ENSG00000163513_3:30697900-30697942
chr15	78908631	78908952	ENSG00000103888_15:78908631-78908952
chr16	57062963	57063257	ENSG00000103034_16:57062963-57063257
chr13	22718012	22718321	ENSG00000102683_13:22718012-22718321
chr5	149602193	149602422	ENSG00000070808_5:149602193-149602422
chr4	41173143	41173440	ENSG00000064042_4:41173143-41173440
chr14	104259446	104259775	ENSG00000185100_14:104259446-104259775
chr6	7127465	7127684	ENSG00000124782_6:7127465-7127684
chr16	81585283	81585528	ENSG00000140945_16:81585283-81585528
chr2	127550953	127551332	ENSG00000136717_2:127550953-127551332
chr6	42015375	42015774	ENSG00000112576_6:42015375-42015774
chr9	128933184	128933413	ENSG00000136859_9:128933184-128933413
chr1	206473721	206473965	ENSG00000076356_1:206473721-206473965
chr6	160042013	160042312	ENSG00000112096_6:160042013-160042312
chr6	7153345	7153584	ENSG00000124782_6:7153345-7153584
chr19	46622535	46622616	ENSG00000142046_19:46622535-46622616
chr3	185763341	185763545	ENSG00000182580_3:185763341-185763545
chr2	144878638	144878867	ENSG00000169554_2:144878638-144878867
chr13	35136177	35136406	ENSG00000172915_13:35136177-35136406
chr2	111637938	111638177	ENSG00000153094_2:111637938-111638177
chr13	34723177	34723486	ENSG00000172915_13:34723177-34723486
chr5	179610685	179610889	ENSG00000050748_5:179610685-179610889
chr14	67913045	67913107	ENSG00000182185_14:67913045-67913107
chr16	28794618	28794847	ENSG00000196296_16:28794618-28794847
chr5	176827848	176828072	ENSG00000113758_5:176827848-176828072
chr9	116866659	116866731	ENSG00000041982_9:116866659-116866731
chr10	105255770	105255989	ENSG00000107954_10:105255770-105255989
chr2	231439270	231439619	ENSG00000135916_2:231439270-231439619
chr16	81977444	81977737	ENSG00000140945_16:81977444-81977737
chr1	85816049	85816199	ENSG00000142871_1:85816049-85816199
chr17	56811948	56812202	ENSG00000141376_17:56811948-56812202
chr14	68341981	68342264	ENSG00000185650_14:68341981-68342264
chr5	172680594	172680863	ENSG00000113739_5:172680594-172680863
chr17	62141303	62141702	ENSG00000154229_17:62141303-62141702
chr2	95052733	95052827	ENSG00000172005_2:95052733-95052827
chr16	87552146	87552505	ENSG00000129993_16:87552146-87552505
chr22	44360343	44360622	ENSG00000077942_22:44360343-44360622
chr1	206293892	206294276	ENSG00000076356_1:206293892-206294276
chr17	45596134	45596533	ENSG00000108823_17:45596134-45596533
chr4	8499938	8500137	ENSG00000087008_4:8499938-8500137
chr3	57169607	57169866	ENSG00000144730_3:57169607-57169866
chr7	150388439	150388838	ENSG00000164885_7:150388439-150388838
chr17	39551949	39552233	ENSG00000108840_17:39551949-39552233
chr16	63642604	63642823	ENSG00000140937_16:63642604-63642823
chr3	115643036	115643305	ENSG00000181722_3:115643036-115643305
chr10	88439660	88440059	ENSG00000122367_10:88439660-88440059
chrX	149544471	149544590	ENSG00000171100_X:149544471-149544590
chr17	58075894	58076133	ENSG00000011028_17:58075894-58076133
chr7	84496657	84496910	ENSG00000153993_7:84496657-84496910
chr17	74387437	74387782	ENSG00000035862_17:74387437-74387782
chr1	234984100	234984424	ENSG00000077522_1:234984100-234984424
chr4	37772530	37772806	ENSG00000065882_4:37772530-37772806
chr14	76009468	76009847	ENSG00000119715_14:76009468-76009847
chr16	82223093	82223133	ENSG00000140945_16:82223093-82223133
chr17	58032574	58032973	ENSG00000146872_17:58032574-58032973
chr5	156667452	156667651	ENSG00000055163_5:156667452-156667651
chr11	8753384	8753783	ENSG00000166444_11:8753384-8753783
chr6	112166703	112167102	ENSG00000010810_6:112166703-112167102
chr3	188942956	188943335	ENSG00000113916_3:188942956-188943335
chr1	17302142	17302355	ENSG00000117115_1:17302142-17302355
chr3	57151642	57151941	ENSG00000144730_3:57151642-57151941
chr17	56576383	56576622	ENSG00000141376_17:56576383-56576622
chr18	8386540	8386739	ENSG00000173482_18:8386540-8386739
chr1	199612030	199612429	ENSG00000118194_1:199612030-199612429
chr17	61895668	61895907	ENSG00000154229_17:61895668-61895907
chr6	123881716	123881955	ENSG00000186439_6:123881716-123881955
chr19	3326530	3326884	ENSG00000141905_19:3326530-3326884
chr15	46530610	46530657	ENSG00000166147_15:46530610-46530657
chr14	67831486	67831885	ENSG00000182185_14:67831486-67831885
chr2	111635998	111636277	ENSG00000153094_2:111635998-111636277
chr1	234946123	234946462	ENSG00000077522_1:234946123-234946462
chr15	75891409	75891683	ENSG00000169783_15:75891409-75891683
chrX	137669038	137669372	ENSG00000129682_X:137669038-137669372
chr6	129716206	129716535	ENSG00000196569_6:129716206-129716535
chr15	75860774	75860998	ENSG00000169783_15:75860774-75860998
chr3	135361358	135361667	ENSG00000163785_3:135361358-135361667
chr6	42098001	42098220	ENSG00000112576_6:42098001-42098220
chr14	68170734	68170938	ENSG00000182185_14:68170734-68170938
chr12	52939163	52939308	ENSG00000094916_12:52939163-52939308
chr1	201295603	201295862	ENSG00000143847_1:201295603-201295862
chr17	9233776	9234105	ENSG00000170310_17:9233776-9234105
chr22	36795406	36795805	ENSG00000100151_22:36795406-36795805
chr4	52598704	52598903	ENSG00000163069_4:52598704-52598903
chr6	34552451	34552735	ENSG00000124507_6:34552451-34552735
chr4	102420015	102420082	ENSG00000138814_4:102420015-102420082
chr8	97996291	97996357	ENSG00000104324_8:97996291-97996357
chr11	8751075	8751373	ENSG00000166444_11:8751075-8751373
chr1	199339443	199339752	ENSG00000081248_1:199339443-199339752
chr4	37792664	37793043	ENSG00000065882_4:37792664-37793043
chr21	44173690	44173894	ENSG00000160216_21:44173690-44173894
chr18	51378012	51378266	ENSG00000196628_18:51378012-51378266
chr17	37891987	37892021	ENSG00000033627_17:37891987-37892021
chr2	85952368	85952687	ENSG00000115525_2:85952368-85952687
chr10	124216366	124216680	ENSG00000166033_10:124216366-124216680
chr15	75750114	75750353	ENSG00000169783_15:75750114-75750353
chr17	3812874	3813123	ENSG00000074370_17:3812874-3813123
chr14	68123705	68123969	ENSG00000182185_14:68123705-68123969
chr17	7997638	7997747	ENSG00000179094_17:7997638-7997747
chr4	37715425	37715525	ENSG00000065882_4:37715425-37715525
chr4	151573293	151573602	ENSG00000198589_4:151573293-151573602
chr11	72008734	72009028	ENSG00000186642_11:72008734-72009028
chr17	62477778	62478127	ENSG00000108878_17:62477778-62478127
chr6	129320256	129320535	ENSG00000196569_6:129320256-129320535
chr14	68164064	68164343	ENSG00000182185_14:68164064-68164343
chr4	78317362	78317621	ENSG00000138764_4:78317362-78317621
chr6	42106432	42106831	ENSG00000112576_6:42106432-42106831
chr3	71705408	71705657	ENSG00000114861_3:71705408-71705657
chr16	82280728	82280820	ENSG00000140945_16:82280728-82280820
chr4	41293303	41293509	ENSG00000064042_4:41293303-41293509
chr4	37728510	37728799	ENSG00000065882_4:37728510-37728799
chr8	121805710	121806069	ENSG00000172164_8:121805710-121806069
chr4	120045130	120045434	ENSG00000172403_4:120045130-120045434
chr8	108581495	108581704	ENSG00000154188_8:108581495-108581704
chrX	119453366	119453615	ENSG00000005893_X:119453366-119453615
chr4	37811338	37811400	ENSG00000065882_4:37811338-37811400
chr2	27359312	27359646	ENSG00000138100_2:27359312-27359646
chr6	128870370	128870528	ENSG00000152894_6:128870370-128870528
chr10	121098184	121098538	ENSG00000198873_10:121098184-121098538
chr6	17627375	17627654	ENSG00000112186_6:17627375-17627654
chr1	206351776	206352035	ENSG00000076356_1:206351776-206352035
chr11	3636406	3636448	ENSG00000129744_11:3636406-3636448
chr1	207892779	207893103	ENSG00000196878_1:207892779-207893103
chr6	36756404	36756773	ENSG00000124762_6:36756404-36756773
chr2	44439091	44439353	ENSG00000138078_2:44439091-44439353
chr14	67953518	67953797	ENSG00000182185_14:67953518-67953797
chr3	71674381	71674780	ENSG00000114861_3:71674381-71674780
chr17	56653733	56654022	ENSG00000141376_17:56653733-56654022
chr17	72952809	72953048	ENSG00000184640_17:72952809-72953048
chr14	68038360	68038624	ENSG00000182185_14:68038360-68038624
chr14	90894035	90894279	ENSG00000015133_14:90894035-90894279
chr18	51314897	51315276	ENSG00000196628_18:51314897-51315276
chr2	40259643	40259902	ENSG00000183023_2:40259643-40259902
chr5	173286151	173286247	ENSG00000113742_5:173286151-173286247
chr11	64800071	64800280	ENSG00000014138_11:64800071-64800280
chr1	62251075	62251274	ENSG00000132849_1:62251075-62251274
chr22	44352718	44353032	ENSG00000077942_22:44352718-44353032
chr14	67834531	67834810	ENSG00000182185_14:67834531-67834810
chr1	10321722	10321788	ENSG00000054523_1:10321722-10321788
chr21	43819181	43819520	ENSG00000160207_21:43819181-43819520
chr9	8652315	8652614	ENSG00000153707_9:8652315-8652614
chr1	149382119	149382518	ENSG00000143434_1:149382119-149382518
chr4	62289648	62289937	ENSG00000150471_4:62289648-62289937
chr1	20826065	20826399	ENSG00000158828_1:20826065-20826399
chr1	119250537	119250821	ENSG00000092607_1:119250537-119250821
chr5	156643204	156643413	ENSG00000055163_5:156643204-156643413
chr13	21147789	21148188	ENSG00000102678_13:21147789-21148188
chr11	65122120	65122439	ENSG00000173442_11:65122120-65122439
chr12	69805615	69805914	ENSG00000127324_12:69805615-69805914
chr8	1994779	1994978	ENSG00000036448_8:1994779-1994978
chr19	54184895	54185244	ENSG00000104812_19:54184895-54185244
chr10	29918500	29918697	ENSG00000197321_10:29918500-29918697
chr5	16984587	16984846	ENSG00000145555_5:16984587-16984846
chr4	41370769	41371148	ENSG00000064042_4:41370769-41371148
chr1	10667861	10668145	ENSG00000130940_1:10667861-10668145
chr3	113534787	113535186	ENSG00000091972_3:113534787-113535186
chr11	8752269	8752342	ENSG00000166444_11:8752269-8752342
chrX	96206103	96206352	ENSG00000147202_X:96206103-96206352
chr5	16725995	16726214	ENSG00000145555_5:16725995-16726214
chr10	121103081	121103330	ENSG00000198873_10:121103081-121103330
chr6	43133572	43133776	ENSG00000137171_6:43133572-43133776
chr8	62795717	62795981	ENSG00000198363_8:62795717-62795981
chr14	69226704	69227048	ENSG00000100647_14:69226704-69227048
chr1	206426162	206426546	ENSG00000076356_1:206426162-206426546
chr10	3814947	3815346	ENSG00000067082_10:3814947-3815346
chr8	121773593	121773987	ENSG00000172164_8:121773593-121773987
chr7	150508747	150508956	ENSG00000146926_7:150508747-150508956
chr1	10637906	10638185	ENSG00000130940_1:10637906-10638185
chr5	43639858	43639952	ENSG00000112992_5:43639858-43639952
chr12	2989398	2989474	ENSG00000197905_12:2989398-2989474
chr10	116289346	116289592	ENSG00000099204_10:116289346-116289592
chr6	7100041	7100305	ENSG00000124782_6:7100041-7100305
chr12	120557270	120557554	ENSG00000182500_12:120557270-120557554
chr9	116058989	116059283	ENSG00000196739_9:116058989-116059283
chrX	130032890	130033144	ENSG00000147256_X:130032890-130033144
chr14	89390398	89390722	ENSG00000140025_14:89390398-89390722
chr9	74390560	74390879	ENSG00000165091_9:74390560-74390879
chr22	48638142	48638351	ENSG00000100426_22:48638142-48638351
chr14	71848421	71848710	ENSG00000182732_14:71848421-71848710
chr14	23798346	23798730	ENSG00000092295_14:23798346-23798730
chr11	40164989	40165387	ENSG00000148948_11:40164989-40165387
chr10	72820049	72820358	ENSG00000107736_10:72820049-72820358
chr4	149302843	149303197	ENSG00000151623_4:149302843-149303197
chr6	41792255	41792639	ENSG00000112561_6:41792255-41792639
chr7	104958011	104958410	ENSG00000135249_7:104958011-104958410
chr1	53519366	53519675	ENSG00000157193_1:53519366-53519675
chr5	159612688	159613017	ENSG00000135083_5:159612688-159613017
chr18	54032024	54032363	ENSG00000049759_18:54032024-54032363
chr12	65359558	65359902	ENSG00000155974_12:65359558-65359902
chr22	22516591	22516990	ENSG00000099964_22:22516591-22516990
chr1	75813016	75813295	ENSG00000137968_1:75813016-75813295
chr1	120298765	120299149	ENSG00000134250_1:120298765-120299149
chr10	80596153	80596483	ENSG00000108175_10:80596153-80596483
chr1	31996950	31997329	ENSG00000121753_1:31996950-31997329
chr5	139006510	139006909	ENSG00000171604_5:139006510-139006909
chr11	124716968	124717367	ENSG00000165495_11:124716968-124717367
chr20	37002110	37002474	ENSG00000101447_20:37002110-37002474
chr19	37860468	37860852	ENSG00000186326_19:37860468-37860852
chr5	134936943	134937156	ENSG00000145824_5:134936943-134937156
chr5	140977819	140978168	ENSG00000131504_5:140977819-140978168
chr22	22883635	22883974	ENSG00000099991_22:22883635-22883974
chr21	42736598	42736997	ENSG00000160185_21:42736598-42736997
chr2	1838198	1838572	ENSG00000186487_2:1838198-1838572
chr10	100228777	100229161	ENSG00000172987_10:100228777-100229161
chr2	26939082	26939401	ENSG00000157851_2:26939082-26939401
chr9	27437305	27437589	ENSG00000120162_9:27437305-27437589
chr18	40637176	40637555	ENSG00000152217_18:40637176-40637555
chr1	149532764	149533028	ENSG00000143393_1:149532764-149533028
chr6	99384941	99385320	ENSG00000184486_6:99384941-99385320
chr13	91648824	91649093	ENSG00000179399_13:91648824-91649093
chr15	83185168	83185457	ENSG00000136383_15:83185168-83185457
chr17	16970166	16970550	ENSG00000133030_17:16970166-16970550
chr2	28683339	28683738	ENSG00000163803_2:28683339-28683738
chr10	106482163	106482492	ENSG00000156395_10:106482163-106482492
chr8	123901612	123902011	ENSG00000178764_8:123901612-123902011
chr6	161056597	161056911	ENSG00000122194_6:161056597-161056911
chr17	77147235	77147613	ENSG00000182446_17:77147235-77147613
chr3	127719682	127719906	ENSG00000159650_3:127719682-127719906
chr21	36759484	36759863	ENSG00000159261_21:36759484-36759863
chr20	34199084	34199403	ENSG00000088367_20:34199084-34199403
chr9	139544966	139545240	ENSG00000130653_9:139544966-139545240
chr11	116353341	116353675	ENSG00000160584_11:116353341-116353675
chr7	45654168	45654547	ENSG00000164742_7:45654168-45654547
chr12	3231729	3232128	ENSG00000011105_12:3231729-3232128
chr7	40833282	40833661	ENSG00000175600_7:40833282-40833661
chr17	34188902	34189106	ENSG00000141720_17:34188902-34189106
chr12	10266519	10266873	ENSG00000139112_12:10266519-10266873

## Sheet: Non-Responding Regions
Chromosome	Start	End	ID
chr19	8332716	8333081	Amplicon_100_19:8332716-8333081		ID's starting with Amplicon are those from the background set
chr11	73038191	73038559	Amplicon_106_11:73038191-73038559		ID's with Ensembl ID's are those from the computationally predicted regions
chr14	61298506	61298864	Amplicon_107_14:61298506-61298864		Sequence coordinates are based on UCSC hg18 release.
chr2	85620686	85621039	Amplicon_109_2:85620686-85621039
chr19	51061864	51062220	Amplicon_114_19:51061864-51062220
chr14	52689945	52690298	Amplicon_115_14:52689945-52690298
chrX	23592527	23592890	Amplicon_119_X:23592527-23592890
chr6	42126379	42126735	Amplicon_120_6:42126379-42126735
chr16	30678945	30679295	Amplicon_122_16:30678945-30679295
chr12	112074806	112075158	Amplicon_129_12:112074806-112075158
chr21	42056828	42057188	Amplicon_135_21:42056828-42057188
chr19	18386840	18387190	Amplicon_13_19:18386840-18387190
chr12	53099533	53099903	Amplicon_142_12:53099533-53099903
chr8	28613734	28614095	Amplicon_146_8:28613734-28614095
chr12	103377925	103378275	Amplicon_149_12:103377925-103378275
chr14	74713202	74713555	Amplicon_150_14:74713202-74713555
chr18	68361289	68361642	Amplicon_152_18:68361289-68361642
chr7	100665436	100665794	Amplicon_157_7:100665436-100665794
chr17	1119365	1119715	Amplicon_166_17:1119365-1119715
chr2	242094888	242095238	Amplicon_174_2:242094888-242095238
chr12	6750606	6750976	Amplicon_175_12:6750606-6750976
chr19	43434285	43434640	Amplicon_177_19:43434285-43434640
chr3	48565158	48565521	Amplicon_180_3:48565158-48565521
chr17	62955537	62955912	Amplicon_181_17:62955537-62955912
chr16	54068637	54068993	Amplicon_183_16:54068637-54068993
chr11	9242163	9242523	Amplicon_184_11:9242163-9242523
chr1	27691340	27691709	Amplicon_194_1:27691340-27691709
chr16	70050504	70050858	Amplicon_195_16:70050504-70050858
chr17	37524020	37524380	Amplicon_19_17:37524020-37524380
chr20	56705808	56706173	Amplicon_20_20:56705808-56706173
chr13	113550142	113550509	Amplicon_21_13:113550142-113550509
chr19	40821788	40822143	Amplicon_22_19:40821788-40822143
chr12	123912004	123912356	Amplicon_25_12:123912004-123912356
chr19	51820502	51820868	Amplicon_30_19:51820502-51820868
chr11	117988281	117988649	Amplicon_43_11:117988281-117988649
chr15	72074524	72074886	Amplicon_45_15:72074524-72074886
chr3	140741240	140741614	Amplicon_53_3:140741240-140741614
chr12	4250990	4251350	Amplicon_55_12:4250990-4251350
chr22	28996863	28997214	Amplicon_59_22:28996863-28997214
chr19	1161174	1161533	Amplicon_5_19:1161174-1161533
chr11	118694539	118694910	Amplicon_60_11:118694539-118694910
chr12	25294122	25294474	Amplicon_61_12:25294122-25294474
chr11	27449688	27450053	Amplicon_68_11:27449688-27450053
chr20	42396509	42396874	Amplicon_74_20:42396509-42396874
chr7	138446533	138446895	Amplicon_76_7:138446533-138446895
chr19	48973727	48974097	Amplicon_78_19:48973727-48974097
chr3	197498531	197498881	Amplicon_79_3:197498531-197498881
chr5	108773684	108774055	Amplicon_81_5:108773684-108774055
chr5	52810341	52810707	Amplicon_84_5:52810341-52810707
chr17	37561100	37561450	Amplicon_8_17:37561100-37561450
chr3	73753843	73754213	Amplicon_9_3:73753843-73754213
chr12	3231657	3232151	ENSG00000011105_12:3231657-3232151
chr5	134936722	134937222	ENSG00000145824_5:134936722-134937222
chr17	77147188	77147667	ENSG00000182446_17:77147188-77147667
chr21	42736568	42737068	ENSG00000160185_21:42736568-42737068
chr18	54031923	54032419	ENSG00000049759_18:54031923-54032419
chr2	28683291	28683767	ENSG00000163803_2:28683291-28683767
chr13	91648696	91649133	ENSG00000179399_13:91648696-91649133
chr5	139006489	139006971	ENSG00000171604_5:139006489-139006971
chr10	100228746	100229236	ENSG00000172987_10:100228746-100229236
chr17	34188784	34189273	ENSG00000141720_17:34188784-34189273
chr2	1838159	1838614	ENSG00000186487_2:1838159-1838614
chr11	124716893	124717389	ENSG00000165495_11:124716893-124717389
chr5	140977759	140978229	ENSG00000131504_5:140977759-140978229
chr14	71848312	71848743	ENSG00000182732_14:71848312-71848743
chr3	127719648	127720055	ENSG00000159650_3:127719648-127720055
chr1	53519269	53519742	ENSG00000157193_1:53519269-53519742
chr14	23798259	23798750	ENSG00000092295_14:23798259-23798750
chrX	130032748	130033177	ENSG00000147256_X:130032748-130033177
chr11	40164966	40165408	ENSG00000148948_11:40164966-40165408
chr7	40833259	40833755	ENSG00000175600_7:40833259-40833755
chr17	16970110	16970607	ENSG00000133030_17:16970110-16970607
chr20	34199059	34199497	ENSG00000088367_20:34199059-34199497
chr10	72820006	72820435	ENSG00000107736_10:72820006-72820435
chr9	27437229	27437648	ENSG00000120162_9:27437229-27437648
chr19	37860393	37860875	ENSG00000186326_19:37860393-37860875
chr1	120298695	120299183	ENSG00000134250_1:120298695-120299183
chr12	10266456	10266910	ENSG00000139112_12:10266456-10266910
chr21	36759463	36759914	ENSG00000159261_21:36759463-36759914
chr1	31996938	31997398	ENSG00000121753_1:31996938-31997398
chr9	139544787	139545284	ENSG00000130653_9:139544787-139545284
chr5	159612643	159613116	ENSG00000135083_5:159612643-159613116
chr8	123901584	123902056	ENSG00000178764_8:123901584-123902056
chr6	161056489	161056957	ENSG00000122194_6:161056489-161056957
chr13	34723138	34723631	ENSG00000172915_13:34723138-34723631
chr15	75749972	75750472	ENSG00000169783_15:75749972-75750472
chr15	75860540	75861019	ENSG00000169783_15:75860540-75861019
chr10	124216262	124216753	ENSG00000166033_10:124216262-124216753
chr8	121805677	121806164	ENSG00000172164_8:121805677-121806164
chr7	150388415	150388912	ENSG00000164885_7:150388415-150388912
chr17	9233727	9234174	ENSG00000170310_17:9233727-9234174
chr11	65121978	65122459	ENSG00000173442_11:65121978-65122459
chr18	8386458	8386866	ENSG00000173482_18:8386458-8386866
chr4	120045014	120045487	ENSG00000172403_4:120045014-120045487
chr6	112166659	112167142	ENSG00000010810_6:112166659-112167142
chr17	3812853	3813335	ENSG00000074370_17:3812853-3813335
chr17	37925447	37925934	ENSG00000033627_17:37925447-37925934
chr10	3814891	3815368	ENSG00000067082_10:3814891-3815368
chr4	41172990	41173484	ENSG00000064042_4:41172990-41173484
chr4	41370710	41371203	ENSG00000064042_4:41370710-41371203
chr1	206293846	206294341	ENSG00000076356_1:206293846-206294341
chr1	206351731	206352176	ENSG00000076356_1:206351731-206352176
chr1	206426108	206426608	ENSG00000076356_1:206426108-206426608
chr22	44360310	44360711	ENSG00000077942_22:44360310-44360711
chr17	74387393	74387890	ENSG00000035862_17:74387393-74387890
chr5	156643128	156643550	ENSG00000055163_5:156643128-156643550
chr5	156667322	156667737	ENSG00000055163_5:156667322-156667737
chr17	58075853	58076332	ENSG00000011028_17:58075853-58076332
chr1	234946054	234946496	ENSG00000077522_1:234946054-234946496
chr3	128919438	128919870	ENSG00000074416_3:128919438-128919870
chr4	37792644	37793081	ENSG00000065882_4:37792644-37793081
chr8	1994564	1995032	ENSG00000036448_8:1994564-1995032
chr14	90894000	90894489	ENSG00000015133_14:90894000-90894489
chr5	149602148	149602616	ENSG00000070808_5:149602148-149602616
chr1	199339365	199339787	ENSG00000081248_1:199339365-199339787
chr4	16218880	16219317	ENSG00000169744_4:16218880-16219317
chr11	72006354	72006813	ENSG00000186642_11:72006354-72006813
chr11	72008627	72009058	ENSG00000186642_11:72008627-72009058
chr3	115642959	115643402	ENSG00000181722_3:115642959-115643402
chr3	116273099	116273523	ENSG00000181722_3:116273099-116273523
chr14	67831425	67831909	ENSG00000182185_14:67831425-67831909
chr14	67834496	67834959	ENSG00000182185_14:67834496-67834959
chr14	67953477	67953952	ENSG00000182185_14:67953477-67953952
chr14	68038150	68038646	ENSG00000182185_14:68038150-68038646
chr14	68123642	68124125	ENSG00000182185_14:68123642-68124125
chr14	68164033	68164532	ENSG00000182185_14:68164033-68164532
chr14	68170510	68170992	ENSG00000182185_14:68170510-68170992
chr6	150559648	150560143	ENSG00000198729_6:150559648-150560143
chr14	68341943	68342380	ENSG00000185650_14:68341943-68342380
chr10	121098162	121098643	ENSG00000198873_10:121098162-121098643
chr16	28794525	28795022	ENSG00000196296_16:28794525-28795022
chr6	129320193	129320659	ENSG00000196569_6:129320193-129320659
chr6	129716184	129716663	ENSG00000196569_6:129716184-129716663
chr8	62795686	62796159	ENSG00000198363_8:62795686-62796159
chr18	51157694	51158098	ENSG00000196628_18:51157694-51158098
chr18	51231580	51232000	ENSG00000196628_18:51231580-51232000
chr18	51314858	51315208	ENSG00000196628_18:51314858-51315208
chr18	51377945	51378398	ENSG00000196628_18:51377945-51378398
chr2	40259499	40259969	ENSG00000183023_2:40259499-40259969
chr4	151573153	151573630	ENSG00000198589_4:151573153-151573630
chr1	207892750	207893230	ENSG00000196878_1:207892750-207893230
chr3	113534745	113535232	ENSG00000091972_3:113534745-113535232
chr22	36795358	36795836	ENSG00000100151_22:36795358-36795836
chr1	119250483	119250882	ENSG00000092607_1:119250483-119250882
chr17	39551886	39552289	ENSG00000108840_17:39551886-39552289
chr13	21147767	21148239	ENSG00000102678_13:21147767-21148239
chr15	78876020	78876508	ENSG00000103888_15:78876020-78876508
chr15	78908561	78909037	ENSG00000103888_15:78908561-78909037
chr17	45596113	45596574	ENSG00000108823_17:45596113-45596574
chr13	22717919	22718364	ENSG00000102683_13:22717919-22718364
chr10	116289327	116289727	ENSG00000099204_10:116289327-116289727
chr10	105294452	105294930	ENSG00000107954_10:105294452-105294930
chr5	172680574	172680989	ENSG00000113739_5:172680574-172680989
chr3	188942872	188943364	ENSG00000113916_3:188942872-188943364
chr6	17627312	17627715	ENSG00000112186_6:17627312-17627715
chr16	57062841	57063335	ENSG00000103034_16:57062841-57063335
chr6	160041940	160042348	ENSG00000112096_6:160041940-160042348
chr14	76009426	76009892	ENSG00000119715_14:76009426-76009892
chr19	54184835	54185271	ENSG00000104812_19:54184835-54185271
chr10	88439608	88440086	ENSG00000122367_10:88439608-88440086
chr2	85952336	85952787	ENSG00000115525_2:85952336-85952787
chr11	125685436	125685931	ENSG00000110063_11:125685436-125685931
chr1	17301948	17302441	ENSG00000117115_1:17301948-17302441
chr3	71674318	71674806	ENSG00000114861_3:71674318-71674806
chr3	71705332	71705804	ENSG00000114861_3:71705332-71705804
chr6	43133539	43134034	ENSG00000137171_6:43133539-43134034
chr6	42121925	42122406	ENSG00000112576_6:42121925-42122406
chr12	54388617	54389099	ENSG00000135424_12:54388617-54389099
chr6	36756293	36756793	ENSG00000124762_6:36756293-36756793
chr6	7100010	7100481	ENSG00000124782_6:7100010-7100481
chr6	7153318	7153733	ENSG00000124782_6:7153318-7153733
chr12	69805585	69806060	ENSG00000127324_12:69805585-69806060
chr2	231439218	231439656	ENSG00000135916_2:231439218-231439656
chrX	137668941	137669400	ENSG00000129682_X:137668941-137669400
chr16	87552094	87552584	ENSG00000129993_16:87552094-87552584
chrX	118695118	118695531	ENSG00000125354_X:118695118-118695531
chr16	81977385	81977858	ENSG00000140945_16:81977385-81977858
chr2	127550915	127551360	ENSG00000136717_2:127550915-127551360
chr17	56576239	56576666	ENSG00000141376_17:56576239-56576666
chr17	56653714	56654211	ENSG00000141376_17:56653714-56654211
chr17	56811786	56812229	ENSG00000141376_17:56811786-56812229
chr2	27359290	27359715	ENSG00000138100_2:27359290-27359715
chr5	126639551	126640010	ENSG00000145794_5:126639551-126640010
chr2	44438979	44439399	ENSG00000138078_2:44438979-44439399
chr16	63642420	63642850	ENSG00000140937_16:63642420-63642850
chr2	111635945	111636387	ENSG00000153094_2:111635945-111636387
chr2	111637795	111638229	ENSG00000153094_2:111637795-111638229
chr4	78317249	78317697	ENSG00000138764_4:78317249-78317697
chr7	150508667	150509096	ENSG00000146926_7:150508667-150509096
chr1	201295452	201295923	ENSG00000143847_1:201295452-201295923
chr10	60714751	60715170	ENSG00000148541_10:60714751-60715170
chr1	149382058	149382553	ENSG00000143434_1:149382058-149382553
chr9	8652213	8652673	ENSG00000153707_9:8652213-8652673
chr3	57151544	57152039	ENSG00000144730_3:57151544-57152039
chr3	57169549	57170029	ENSG00000144730_3:57169549-57170029
chr17	61895473	61895938	ENSG00000154229_17:61895473-61895938
chr17	62141268	62141755	ENSG00000154229_17:62141268-62141755
chr4	128921379	128921857	ENSG00000164070_4:128921379-128921857
chr11	8750989	8751454	ENSG00000166444_11:8750989-8751454
chr11	8753323	8753805	ENSG00000166444_11:8753323-8753805
chr21	43819085	43819555	ENSG00000160207_21:43819085-43819555
chr3	135361280	135361690	ENSG00000163785_3:135361280-135361690
chr21	44173660	44174129	ENSG00000160216_21:44173660-44174129
chr4	8499926	8500349	ENSG00000087008_4:8499926-8500349
chr5	179610437	179610920	ENSG00000050748_5:179610437-179610920
chr1	85815968	85816378	ENSG00000142871_1:85815968-85816378
chr4	41293166	41293618	ENSG00000064042_4:41293166-41293618
chr8	97996084	97996554	ENSG00000104324_8:97996084-97996554
chr3	185763285	185763733	ENSG00000182580_3:185763285-185763733
chr11	3636278	3636759	ENSG00000129744_11:3636278-3636759
chr8	108581396	108581864	ENSG00000154188_8:108581396-108581864
chr17	56788792	56789193	ENSG00000141376_17:56788792-56789193
chr17	62477735	62478222	ENSG00000108878_17:62477735-62478222
chr4	37811037	37811485	ENSG00000065882_4:37811037-37811485
chr16	82222904	82223327	ENSG00000140945_16:82222904-82223327
chr1	10637858	10638356	ENSG00000130940_1:10637858-10638356
chr17	72952780	72953262	ENSG00000184640_17:72952780-72953262
chr16	81585110	81585595	ENSG00000140945_16:81585110-81585595
chrX	119453277	119453774	ENSG00000005893_X:119453277-119453774
chr9	128932962	128933444	ENSG00000136859_9:128932962-128933444
chr6	42097766	42098261	ENSG00000112576_6:42097766-42098261
chr19	46622443	46622933	ENSG00000142046_19:46622443-46622933
chr15	46530543	46531000	ENSG00000166147_15:46530543-46531000
chr5	16725923	16726360	ENSG00000145555_5:16725923-16726360
chr4	37772486	37772899	ENSG00000065882_4:37772486-37772899
chr12	52938884	52939360	ENSG00000094916_12:52938884-52939360
chr5	16984477	16984883	ENSG00000145555_5:16984477-16984883
chr11	8751879	8752363	ENSG00000166444_11:8751879-8752363
chr3	30697639	30697999	ENSG00000163513_3:30697639-30697999
chr6	123881624	123882035	ENSG00000186439_6:123881624-123882035
chr17	37891629	37892116	ENSG00000033627_17:37891629-37892116
chr16	82280466	82280894	ENSG00000140945_16:82280466-82280894
chr1	206473522	206473995	ENSG00000076356_1:206473522-206473995
chr3	71490812	71491301	ENSG00000114861_3:71490812-71491301
chr14	67912676	67913176	ENSG00000182185_14:67912676-67913176
chr13	35136155	35136575	ENSG00000172915_13:35136155-35136575
chr10	29918286	29918722	ENSG00000197321_10:29918286-29918722
chr2	95052637	95053085	ENSG00000172005_2:95052637-95053085
chr4	37715341	37715752	ENSG00000065882_4:37715341-37715752
chr10	121102967	121103367	ENSG00000198873_10:121102967-121103367
chr14	69226653	69227119	ENSG00000100647_14:69226653-69227119
chrX	149544198	149544698	ENSG00000171100_X:149544198-149544698
chr10	105255617	105256052	ENSG00000107954_10:105255617-105256052
chr17	7997496	7997913	ENSG00000179094_17:7997496-7997913
chr9	116866607	116867010	ENSG00000041982_9:116866607-116867010
chr1	116072499	116072993	ENSG00000118729_1:116072499-116072993
chr1	10668200	10668693	ENSG00000130940_1:10668200-10668693
chr12	2989038	2989526	ENSG00000197905_12:2989038-2989526
chr5	176827819	176828318	ENSG00000113758_5:176827819-176828318
chr6	128870255	128870661	ENSG00000152894_6:128870255-128870661
chr1	234983994	234984480	ENSG00000077522_1:234983994-234984480
chr1	20825925	20826422	ENSG00000158828_1:20825925-20826422
chr7	84496600	84497041	ENSG00000153993_7:84496600-84497041
chr4	102419700	102420138	ENSG00000138814_4:102419700-102420138
chr6	42015352	42015827	ENSG00000112576_6:42015352-42015827
chr8	121773566	121774007	ENSG00000172164_8:121773566-121774007
chr20	43888449	43888932	ENSG00000101470_20:43888449-43888932
chr5	173285984	173286454	ENSG00000113742_5:173285984-173286454
chr6	34552345	34552756	ENSG00000124507_6:34552345-34552756

## Sheet: Responding Regions
Chromosome	Start	End	ID
chr2	144878533	144878970	ENSG00000169554_2:144878533-144878970
chr4	37728494	37728957	ENSG00000065882_4:37728494-37728957
chr9	35677887	35678364	ENSG00000198467_9:35677887-35678364
chr14	104259362	104259861	ENSG00000185100_14:104259362-104259861
chr1	199611961	199612457	ENSG00000118194_1:199611961-199612457
chr6	42106373	42106867	ENSG00000112576_6:42106373-42106867
chr6	7127364	7127817	ENSG00000124782_6:7127364-7127817
chr19	3326490	3326905	ENSG00000141905_19:3326490-3326905
chr2	88147915	88148315	ENSG00000115593_2:88147915-88148315
chr1	119250477	119250882	ENSG00000092607_1:119250477-119250882
chr19	54184834	54185225	ENSG00000104812_19:54184834-54185225
chr22	22883584	22884017	ENSG00000099991_22:22883584-22884017
chr15	83184998	83185491	ENSG00000136383_15:83184998-83185491
chr18	40637097	40637579	ENSG00000152217_18:40637097-40637579
chr22	22516569	22517062	ENSG00000099964_22:22516569-22517062
chr11	66008803	66009164	Amplicon_11_11:66008803-66009164
chr11	116201218	116201584	Amplicon_123_11:116201218-116201584
chr11	1721407	1721765	Amplicon_38_11:1721407-1721765
chr11	71615350	71615709	Amplicon_46_11:71615350-71615709
Sequence coordinates are based on UCSC hg18 release.

## Sheet: General (Non-MT) CRMs
Chromosome	Start	End	ID	Gene
22	28996863	28997214	Amplicon_59	TTC28
14	61298506	61298864	Amplicon_107	MNAT1
16	54068637	54068993	Amplicon_183	FTO
2	1838198	1838572	chr2:1838198-1838572	MYT1L
17	37925331	37925730	chr17:37925331-37925730	IKZF3
These regions resulted in increased expression in all 3 cell types: fibroblasts, myoblasts and myotubes.
In order to obtain these regions, vsn-normalized mean expression ratios in all 3 cell types were combined and the top 10 percentile value was calculated.
Those regions that showed ratios greater than this threshold in all three cell types are listed above.
It should be noted that the above list contains the entirety of the fibroblast regions that made the threshold.
Attempts to identify any FB-specific CRMs were unsuccessful.
